# Supplementary material for: Exposure to selective serotonin reuptake inhibitors and the risk of congenital malformations: a nationwide cohort study
Source: PubMed Central journal article supplement — BMJ Open. 2012 Jun 18;2(3):e001148. doi: 10.1136/bmjopen-2012-001148 (PMC3378942; doi:10.1136/bmjopen-2012-001148), 2012-06-18
Supplement: bmjopen-2012-001148-s1.pdf [file bmjopen-2012-001148-s1.pdf]

Supplement A. Odds Ratios (OR) and 95% confidence intervals (95% CI) for the incidence and risk of congenital malformations among women exposed to individual SSRIs vs. women with no exposure

|                                       | SSRI<br>(n=4183) |                             | Citalopram<br>(n=1606) |                             | Escitalopram<br>(n=293) |                             | Fluoxetine<br>(n=928) |                             | Paroxetine<br>(n=568) |                             | Sertraline<br>(n=817) |                             |
|---------------------------------------|------------------|-----------------------------|------------------------|-----------------------------|-------------------------|-----------------------------|-----------------------|-----------------------------|-----------------------|-----------------------------|-----------------------|-----------------------------|
|                                       | N<br>(%)         | OR<br>(95% CI) <sup>a</sup> | N<br>(%)               | OR<br>(95% CI) <sup>a</sup> | N<br>(%)                | OR<br>(95% CI) <sup>a</sup> | N<br>(%)              | OR<br>(95% CI) <sup>a</sup> | N<br>(%)              | OR<br>(95% CI) <sup>a</sup> | N<br>(%)              | OR<br>(95% CI) <sup>a</sup> |
| <b>Congenital malformations</b>       | 208<br>(4.97)    | 1.33<br>(1.16-1.53)         | 89<br>(5.54)           | 89<br>(5.54-1.51)           | 8<br>(2.73)             | 0.69<br>(0.34-1.4)          | 41<br>(4.42)          | 1.18<br>(0.86-1.61)         | 26<br>(4.58)          | 1.25<br>(0.84-1.85)         | 44<br>(5.39)          | 1.41<br>(1.03-1.92)         |
| <b>Major</b>                          | 7<br>(0.17)      | 1.13<br>(0.54-2.39)         | 2<br>(0.12)            | 2<br>(0.12-0.84)            | 1<br>(0.34)             | 2.25<br>(0.32-16.05)        | 2<br>(0.22)           | 1.44<br>(0.36-5.79)         | 1<br>(0.18)           | 1.19<br>(0.17-8.45)         | 1<br>(0.12)           | 0.85<br>(0.12-6.07)         |
| <b>Of the nervous system</b>          | 1<br>(0.02)      | 0.73<br>(0.1-5.21)          | -                      | -                           | 0<br>(0)                | -                           | 1<br>(0.11)           | 3.22<br>(0.45-23.03)        | 0<br>(0)              | -                           | 0<br>(0)              | -                           |
| <b>Neural Tube Defects</b>            | 7<br>(0.17)      | 1.43<br>(0.68-3.01)         | 5<br>(0.31)            | 5<br>(0.31-2.62)            | 0<br>(0)                | -                           | 1<br>(0.11)           | 0.93<br>(0.13-6.63)         | 0<br>(0)              | -                           | 1<br>(0.12)           | 1.05<br>(0.15-7.45)         |
| <b>Of the eye</b>                     | 2<br>(0.05)      | 2.36<br>(0.58-9.61)         | 0<br>(0)               | -                           | 0<br>(0)                | -                           | 0<br>(0)              | -                           | 1<br>(0.18)           | 8.32<br>(1.16-59.81)        | 1<br>(0.12)           | 6.13<br>(0.85-44.05)        |
| <b>Of the ear, face and neck</b>      | 77<br>(1.84)     | 2.01<br>(1.6-2.53)          | 28<br>(1.74)           | 28<br>(1.74-1.91)           | 3<br>(1.02)             | 1.06<br>(0.34-3.3)          | 17<br>(1.83)          | 2.05<br>(1.27-3.31)         | 8<br>(1.41)           | 1.54<br>(0.77-3.1)          | 21<br>(2.57)          | 2.73<br>(1.75-4.26)         |
| <b>Of the heart</b>                   | 49<br>(1.17)     | 2.04<br>(1.53-2.72)         | 17<br>(1.06)           | 17<br>(1.06-1.86)           | 2<br>(0.68)             | 1.12<br>(0.28-4.51)         | 9<br>(0.97)           | 1.73<br>(0.89-3.33)         | 6<br>(1.06)           | 1.89<br>(0.85-4.23)         | 15<br>(1.84)          | 3.09<br>(1.82-5.25)         |
| <b>Septal defects</b>                 | 21<br>(0.5)      | 1.62<br>(1.05-2.5)          | 7<br>(0.44)            | 7<br>(0.44-1.41)            | 0<br>(0)                | 0<br>(0-0)                  | 3<br>(0.32)           | 1.03<br>(0.33-3.2)          | 2<br>(0.35)           | 1.13<br>(0.28-4.54)         | 9<br>(1.1)            | 3.6<br>(1.86-6.96)          |
| <b>Ventricular septal defects</b>     | 34<br>(0.81)     | 2.6<br>(1.84-3.68)          | 12<br>(0.75)           | 12<br>(0.75-2.41)           | 1<br>(0.34)             | 1.01<br>(0.14-7.23)         | 7<br>(0.75)           | 2.53<br>(1.2-5.32)          | 6<br>(1.06)           | 3.51<br>(1.57-7.87)         | 8<br>(0.98)           | 2.85<br>(1.35-5.99)         |
| <b>Atrial septal defects</b>          | 2<br>(0.05)      | 1.25<br>(0.31-5.02)         | 0<br>(0)               | -                           | 1<br>(0.34)             | 8.71<br>(1.21-62.64)        | 0<br>(0)              | -                           | 0<br>(0)              | -                           | 1<br>(0.12)           | 3.22<br>(0.45-23.03)        |
| <b>Atrioventricular septal</b>        | 7<br>(0.17)      | 1.41<br>(0.67-2.98)         | 2<br>(0.12)            | 2<br>(0.12-1.03)            | 1<br>(0.34)             | 2.66<br>(0.37-19.02)        | 1<br>(0.11)           | 0.94<br>(0.13-6.67)         | 1<br>(0.18)           | 1.52<br>(0.21-10.8)         | 2<br>(0.24)           | 2.09<br>(0.52-8.38)         |
| <b>Of the respiratory system</b>      | 6<br>(0.14)      | 1.02<br>(0.46-2.27)         | 4<br>(0.25)            | 4<br>(0.25-1.8)             | 0<br>(0)                | -                           | 1<br>(0.11)           | 0.76<br>(0.11-5.4)          | 0<br>(0)              | 0<br>(0-0)                  | 1<br>(0.12)           | 0.88<br>(0.12-6.24)         |
| <b>Oro-facial clefts</b>              | 13<br>(0.31)     | 1.8<br>(1.04-3.12)          | 7<br>(0.44)            | 7<br>(0.44-2.5)             | 0<br>(0)                | -                           | 2<br>(0.22)           | 1.25<br>(0.31-5)            | 2<br>(0.35)           | 2.09<br>(0.52-8.39)         | 2<br>(0.24)           | 1.43<br>(0.36-5.74)         |
| <b>Of the digestive system</b>        | 1<br>(0.02)      | 1.04<br>(0.14-7.44)         | 1<br>(0.06)            | 1<br>(0.06-2.54)            | 0<br>(0)                | -                           | 0<br>(0)              | -                           | 0<br>(0)              | -                           | 0<br>(0)              | -                           |
| <b>Abdominal wall defects</b>         | 11<br>(0.26)     | 0.84<br>(0.45-1.57)         | 9<br>(0.56)            | 9<br>(0.56-2.02)            | 0<br>(0)                | -                           | 0<br>(0)              | -                           | 0<br>(0)              | -                           | 2<br>(0.24)           | 0.44<br>(0.06-3.11)         |
| <b>Of the internal urinary system</b> | 19<br>(0.45)     | 1.55<br>(0.99-2.44)         | 8<br>(0.5)             | 8<br>(0.5-1.7)              | 1<br>(0.34)             | 1.08<br>(0.15-7.67)         | 3<br>(0.32)           | 1.09<br>(0.35-3.38)         | 6<br>(1.06)           | 3.83<br>(1.71-8.57)         | 1<br>(0.12)           | 0.41<br>(0.06-2.93)         |
| <b>Of the external genital organs</b> | 53<br>(1.27)     | 0.93<br>(0.71-1.23)         | 24<br>(1.49)           | 24<br>(1.49-1.13)           | 1<br>(0.34)             | 0.25<br>(0.04-1.75)         | 10<br>(1.08)          | 0.76<br>(0.41-1.42)         | 7<br>(1.23)           | 0.91<br>(0.43-1.92)         | 11<br>(1.35)          | 1<br>(0.55-1.81)            |
| <b>Of the limbs</b>                   | 8<br>(0.19)      | 1.29<br>(0.64-2.59)         | 3<br>(0.19)            | 3<br>(0.19-1.25)            | 1<br>(0.34)             | 2.18<br>(0.31-15.57)        | 2<br>(0.22)           | 1.46<br>(0.36-5.85)         | 1<br>(0.18)           | 1.2<br>(0.17-8.55)          | 1<br>(0.12)           | 0.83<br>(0.12-5.9)          |
| <b>Of the musculoskeletal system</b>  | 7<br>(0.17)      | 1.57<br>(0.74-3.31)         | 1<br>(0.06)            | 1<br>(0.06-0.59)            | 0<br>(0)                | -                           | 1<br>(0.11)           | 0.97<br>(0.14-6.92)         | 3<br>(0.53)           | 4.65<br>(1.49-14.53)        | 2<br>(0.24)           | 2.35<br>(0.59-9.45)         |
| <b>Chromosomal abnormalities</b>      |                  |                             |                        |                             |                         |                             |                       |                             |                       |                             |                       |                             |

|                                  |             |                     |             |                  |          |   |             |                      |          |   |             |                       |
|----------------------------------|-------------|---------------------|-------------|------------------|----------|---|-------------|----------------------|----------|---|-------------|-----------------------|
| <b>Other malformations</b>       | 9<br>(0.22) | 1.36<br>(0.68-2.74) | 4<br>(0.25) | 4<br>(0.25-1.32) | 0<br>(0) | - | 4<br>(0.43) | 3.08<br>(1.15-8.23)  | 0<br>(0) | - | 1<br>(0.12) | 0.88<br>(0.12-6.28)   |
| <b>And teratogenic syndromes</b> | 2<br>(0.05) | 2.78<br>(0.67-11.6) | 1<br>(0.06) | 1<br>(0.06-3.58) | 0<br>(0) | - | 0<br>(0)    | -                    | 0<br>(0) | - | 1<br>(0.12) | 10.13<br>(1.36-75.44) |
| <b>Genetic syndromes</b>         | 1<br>(0.02) | 0.39<br>(0.06-2.78) | 0<br>(0)    | -                | 0<br>(0) | - | 1<br>(0.11) | 1.79<br>(0.25-12.76) | 0<br>(0) | - | 0<br>(0)    | -                     |

Incidence is presented as number of cases (N) with percentages (%). Estimates of multivariable logistic regressions are presented as Odds Ratios (OR) with 95% confidence intervals (95% CI) <sup>a</sup>Multivariable logistic regressions are adjusted for mother's age, parity, income, education, smoking and year of conception.
