# Supplementary material for: Exposure to selective serotonin reuptake inhibitors and the risk of congenital malformations: a nationwide cohort study
Source: PubMed Central journal article supplement — BMJ Open. 2012 Jun 18;2(3):e001148. doi: 10.1136/bmjopen-2012-001148 (PMC3378942; doi:10.1136/bmjopen-2012-001148), 2012-06-18
Supplement: bmjopen-2012-001148-s2.pdf [file bmjopen-2012-001148-s2.pdf]

**Supplement B. Risk of congenital malformations among women exposed to an SSRI vs. women with no exposure further adjusted for co-medication.**

| Outcome                                                        | Exposed to any SSRI       |                  |                                  |                  | No exposure  |
|----------------------------------------------------------------|---------------------------|------------------|----------------------------------|------------------|--------------|
|                                                                | First trimester<br>N=4183 |                  | Paused during pregnancy<br>N=806 |                  | N=843 797    |
|                                                                | N (%)                     | OR (96% CI)      | N (%)                            | OR (96% CI)      | N (%)        |
| <b>Major malformations</b>                                     | 208 (4.97)                | 1.32 (1.14-1.52) | 36 (4.47)                        | 1.27 (0.91-1.77) | 29703 (3.52) |
| <b>Congenital malformations of the heart</b>                   | 77 (1.84)                 | 1.98 (1.57-2.49) | 13 (1.61)                        | 1.84 (1.06-3.19) | 7755 (0.92)  |
| <b>Septal defects</b>                                          | 49 (1.17)                 | 2.00 (1.50-2.67) | 11 (1.36)                        | 2.54 (1.40-4.62) | 4826 (0.57)  |
| <b>Ventricular septal defects</b>                              | 21 (0.50)                 | 1.58 (1.02-2.44) | 9 (1.12)                         | 3.71 (1.92-7.17) | 2803 (0.33)  |
| <b>Atrial septal defects</b>                                   | 34 (0.81)                 | 2.54 (1.79-3.60) | 6 (0.74)                         | 2.60 (1.16-5.81) | 2490 (0.30)  |
| <b>Congenital malformations of the digestive system</b>        | 13 (0.31)                 | 1.74 (1.00-3.02) | 1 (0.12)                         | 0.74 (0.10-5.29) | 1545 (0.18)  |
| <b>Congenital malformations of the internal urinary system</b> | 11 (0.26)                 | 0.86 (0.46-1.60) | -                                | -                | 2333 (0.28)  |
| <b>Congenital malformations of the external genital organs</b> | 19 (0.45)                 | 1.53 (0.97-2.41) | 2 (0.25)                         | 0.89 (0.22-3.57) | 2504 (0.30)  |
| <b>Congenital malformations of the limbs</b>                   | 53 (1.27)                 | 0.93 (0.71-1.22) | 14 (1.74)                        | 1.36 (0.80-2.31) | 11785 (1.40) |

Estimates are presented as Odds Ratios (OR) with 95% confidence intervals (95% CI). Multivariable logistic regressions are adjusted for mother's age, parity, income, education, smoking, year of conception and co-medication with psycholeptics and antidiabetics.
