# Supplementary material for: Exposure to selective serotonin reuptake inhibitors and the risk of congenital malformations: a nationwide cohort study
Source: PubMed Central journal article supplement — BMJ Open. 2012 Jun 18;2(3):e001148. doi: 10.1136/bmjopen-2012-001148 (PMC3378942; doi:10.1136/bmjopen-2012-001148), 2012-06-18
Supplement: bmjopen-2012-001148-s3.pdf [file bmjopen-2012-001148-s3.pdf]

**Supplement C. Adjusted odds Ratios (OR) and 95% confidence intervals (95% CI) for association between congenital malformations among women pausing SSRI treatment three, six or nine months before pregnancy**

| <b>Outcome</b>                                                 | <b>Three months (n=806)</b> |                    | <b>Six months (n=681)</b> |                    | <b>Nine months (n=441)</b> |                    |
|----------------------------------------------------------------|-----------------------------|--------------------|---------------------------|--------------------|----------------------------|--------------------|
|                                                                | <b>N (%)</b>                | <b>OR (95% CI)</b> | <b>N (%)</b>              | <b>OR (95% CI)</b> | <b>N (%)</b>               | <b>OR (95% CI)</b> |
| <b>Major malformations</b>                                     | 36 (4.47)                   | 1.27 (0.91-1.78)   | 29 (4.26)                 | 1.21 (0.83-1.75)   | 19 (4.31)                  | 1.22 (0.77-1.93)   |
| <b>Congenital malformations of the heart</b>                   | 13 (1.61)                   | 1.85 (1.07-3.20)   | 12 (1.76)                 | 2.02 (1.14-3.57)   | 8 (1.81)                   | 2.07 (1.03-4.17)   |
| <b>Septal defects</b>                                          | 11 (1.36)                   | 2.56 (1.41-4.64)   | 10 (1.47)                 | 2.73 (1.46-5.09)   | 6 (1.36)                   | 2.52 (1.12-5.64)   |
| <b>Ventricular septum defects</b>                              | 9 (1.12)                    | 3.74 (1.93-7.23)   | 8 (1.17)                  | 3.90 (1.94-7.85)   | 4 (0.91)                   | 3.00 (1.12-8.04)   |
| <b>Atrial septum defects</b>                                   | 6 (0.74)                    | 2.61 (1.17-5.84)   | 5 (0.73)                  | 2.55 (1.05-6.14)   | 3 (0.68)                   | 2.35 (0.75-7.31)   |
| <b>Congenital malformations of the digestive system</b>        | 1 (0.12)                    | 0.75 (0.11-5.35)   | 1 (0.15)                  | 0.90 (0.13-6.41)   | 1 (0.23)                   | 1.41 (0.2-10.01)   |
| <b>Congenital malformations of the internal urinary system</b> | -                           | -                  | -                         | -                  | -                          | -                  |
| <b>Congenital malformations of the external genital organs</b> | 2 (0.25)                    | 0.89 (0.22-3.59)   | -                         | -                  | -                          | -                  |
| <b>Congenital malformations of the limbs</b>                   | 14 (1.74)                   | 1.37 (0.80-2.32)   | 11 (1.62)                 | 1.26 (0.70-2.30)   | 7 (1.59)                   | 1.23 (0.58-2.60)   |

Estimates are presented as Odds Ratios (OR) with 95% confidence intervals (95% CI). Multivariable logistic regressions are adjusted for mother's age, parity, income, education, smoking and year of conception.
